# Supplementary material for: Conservation of Tubulin-Binding Sequences in TRPV1 throughout Evolution
Source: PLoS One. 2012 Apr 9;7(4):e31448. doi: 10.1371/journal.pone.0031448 (PMC3322131; doi:10.1371/journal.pone.0031448)
Supplement: Table S2 — Accession ID, isoforms, transcript IDs and corresponding lengths of Histone sequences from different species. (XLSX) [file pone.0031448.s002.xlsx]

## Sheet: Sheet1
Organisms	Scientific Name	Name of the Histone isoform	Transcription ID	Protein ID	Length (aa)
Human	Homo sapiens	HIST1H3B-001	ENST00000244661	ENSP00000244661	136
Human	Homo sapiens	HIST1H3C-001	ENST00000360577	ENSP00000353783	136
Human	Homo sapiens	HIST1H3E-001	ENST00000360408	ENSP00000353581	136
Human	Homo sapiens	HIST1H3A-001	ENST00000357647	ENSP00000350275	136
Human	Homo sapiens	HIST1H4G-001	ENST00000244537	ENSP00000244537	98
Human	Homo sapiens	HIST1H4H-001	ENST00000377727	ENSP00000366956	103
Human	Homo sapiens	HIST1H4J-001	ENST00000355057	ENSP00000347168	103
Human	Homo sapiens	HIST1H4B-001	ENST00000377364	ENSP00000366581	103
Human	Homo sapiens	HIST2H4A-001	ENST00000369165	ENSP00000358162	103
Human	Homo sapiens	HIST1H4D-001	ENST00000340756	ENSP00000343282	103
Human	Homo sapiens	HIST1H4C-001	ENST00000377803	ENSP00000367034	103
Human	Homo sapiens	HIST4H4-201	ENST00000358064	ENSP00000350767	103
Human	Homo sapiens	HIST1H4K-001	ENST00000357549	ENSP00000350159	103
Human	Homo sapiens	HIST1H4F-001	ENST00000377745	ENSP00000366974	103
Mouse	Mus musculus	Hist4h4-201	ENSMUST00000087714	ENSMUSP00000085006	103
Mouse	Mus musculus	Hist1h4m-001	ENSMUST00000102979	ENSMUSP00000100044	103
Mouse	Mus musculus	Hist1h4a-001	ENSMUST00000102964	ENSMUSP00000100029	103
Mouse	Mus musculus	Hist1h4i-001	ENSMUST00000102977	ENSMUSP00000100042	103
Mouse	Mus musculus	Hist1h4h-001	ENSMUST00000102972	ENSMUSP00000100037	103
Mouse	Mus musculus	Hist1h4f-001	ENSMUST00000102971	ENSMUSP00000100036	103
Rat	Rattus norvegicus	Hist1h4b	ENSRNOT00000043151	ENSRNOP00000041042	103
Rat	Rattus norvegicus	Hist1h4m	ENSRNOT00000051095	ENSRNOP00000039070	103
Rat	Rattus norvegicus	LOC684745	ENSRNOT00000042906	ENSRNOP00000046288	103
Rat	Rattus norvegicus	LOC680097	ENSRNOT00000049464	ENSRNOP00000041383	103
Gorilla	Gorilla gorilla	Novel	ENSGGOT00000027616	ENSGGOP00000021745	103
Gorilla	Gorilla gorilla	Novel	ENSGGOT00000026153	ENSGGOP00000021754	103
Gorilla	Gorilla gorilla	Novel	ENSGGOT00000027490	ENSGGOP00000019841	103
Gorilla	Gorilla gorilla	Novel	ENSGGOT00000023303	ENSGGOP00000018935	103
Chimp	Pan troglodytes	Q6B824_PANTR	ENSPTRT00000002297	ENSPTRP00000002100	103
Chicken	Gallus gallus	H4_CHICK	ENSGALT00000038101	ENSGALP00000037309	103
Chicken	Gallus gallus	H4_CHICK	ENSGALT00000038081	ENSGALP00000037289	103
Chicken	Gallus gallus	H4_CHICK	ENSGALT00000038088	ENSGALP00000037296	103
Chicken	Gallus gallus	H4_CHICK	ENSGALT00000038111	ENSGALP00000037319	103
Dog	Canis familiaris	Q6B829_CANFA	ENSCAFT00000017587	ENSCAFP00000016285	107
Dog	Canis familiaris	Q6B829_CANFA	ENSCAFT00000018062		106
Dog	Canis familiaris	Q6B829_CANFA	ENSCAFT00000020608		103
Dog	Canis familiaris	Q6B829_CANFA	ENSCAFT00000037501		107
Elephant	Loxodonta africana	H4g	ENSLAFT00000029412		124
Elephant	Loxodonta africana	H4d	ENSLAFT00000005398		103
Elephant	Loxodonta africana	H4k	ENSLAFT00000029033		104
Elephant	Loxodonta africana	H4f	ENSLAFT00000033031		103
Orangutan	Pongo pygmaeus	H4	ENSPPYT00000005128		103
Orangutan	Pongo pygmaeus	H418953	ENSPPYT00000018953		103
Orangutan	Pongo pygmaeus	H418982	ENSPPYT00000018982		103
Orangutan	Pongo pygmaeus	H419007	ENSPPYT00000019007		103
Armadillo	Dasypus novemcinctus	H4l	ENSDNOT00000017116		103
Armadillo	Dasypus novemcinctus	H4a	ENSDNOT00000023603		103
Armadillo	Dasypus novemcinctus	H4k	ENSDNOT00000023656		103
Kangaroo Rat	Dipodomys ordii	H405270	ENSDORT00000005270		103
Marmoset	Callithrix jacchus	H4k	ENSCJAT00000042723		103
Marmoset	Callithrix jacchus	H4a	ENSCJAT00000021501	ENSCJAP00000020351	103
Drosophila	Drosophila melanogaster	H4		His4:CG33871-RA (FBtr0091875)	103
Drosophila	Drosophila melanogaster	H4		His4:CG33873-RA (FBtr0091877)	103
Zebra Finch	Taeniopygia guttata	H4h	B5FXC8_TAEGU (ENSTGUT00000009708)		103
Zebra Finch	Taeniopygia guttata	H4	B5FXC8_TAEGU (ENSTGUT00000009694)		103
Xenopus	Xenopus tropicalis	H4c	H4_XENTR (ENSXETT00000001377)		103
Xenopus	Xenopus tropicalis	H4d	H4_XENTR (ENSXETT00000056197)		103
Dolphin	Tursiops truncates	H4h	ENSTTRT00000005090		103
Dolphin	Tursiops truncates	H4a	ENSTTRT00000013461		103
Northern tree Shrew	Tupaia belangeri	H4f	ENSTBET00000002013		103
Northern tree Shrew	Tupaia belangeri	H4a	ENSTBET00000015096		103
Wallaby	Macropus eugenii	H4l	ENSMEUT00000003953		103
Wallaby	Macropus eugenii	H4i	ENSMEUT00000011632		103
Bush Baby	Otolemur garnettii	H4k	ENSOGAT00000008007		103
Bush Baby	Otolemur garnettii	H4c	ENSOGAT00000014908		103
Shrew	Sorex araneus	H4h	ENSSART00000004834		103
Shrew	Sorex araneus	H4b	ENSSART00000010365		103
Platypus	Ornithorhynchus anatinus	H4d	ENSOANT00000000327		103
Platypus	Ornithorhynchus anatinus	H4k	ENSOANT00000000351		103
Rabbit	Oryctolagus cuniculus	H4g	ENSOCUT00000029176		103
Rabbit	Oryctolagus cuniculus	H4l	ENSOCUT00000017164		103
Pika	Ochotona princeps	H4a	ENSOPRT00000001221		103
Pika	Ochotona princeps	H4c	ENSOPRT00000014052		103
Marmoset	Callithrix jacchus	H4k	ENSCJAT00000042723		103
Hyrax	Procavia capensis	H4l	ENSPCAG00000002592		103
Hyrax	Procavia capensis	H4a	ENSPCAG00000014210		103
Hyrax	Procavia capensis	H4c	ENSPCAG00000018848		103
Roundworm	Caenorhabditis elegans	H4	H4_CAEEL (C50F4.7)		103
Roundworm	Caenorhabditis elegans	H4	H4_CAEEL (F07B7.9)		103
Lesser Hedgehog	Echinops telfairi	H4g	ENSETET00000014369		103
Lesser Hedgehog	Echinops telfairi	H4a	ENSETET00000001955		103
